# Supplementary material for: Identification of key genes in rheumatoid arthritis and osteoarthritis based on bioinformatics analysis
Source: PubMed Central journal article supplement (PMC6392928; doi:10.1097/md.0000000000010997), 2018-06-01

Supplementary Figure 1 Protein-protein interaction networks between RA vs. NC samples

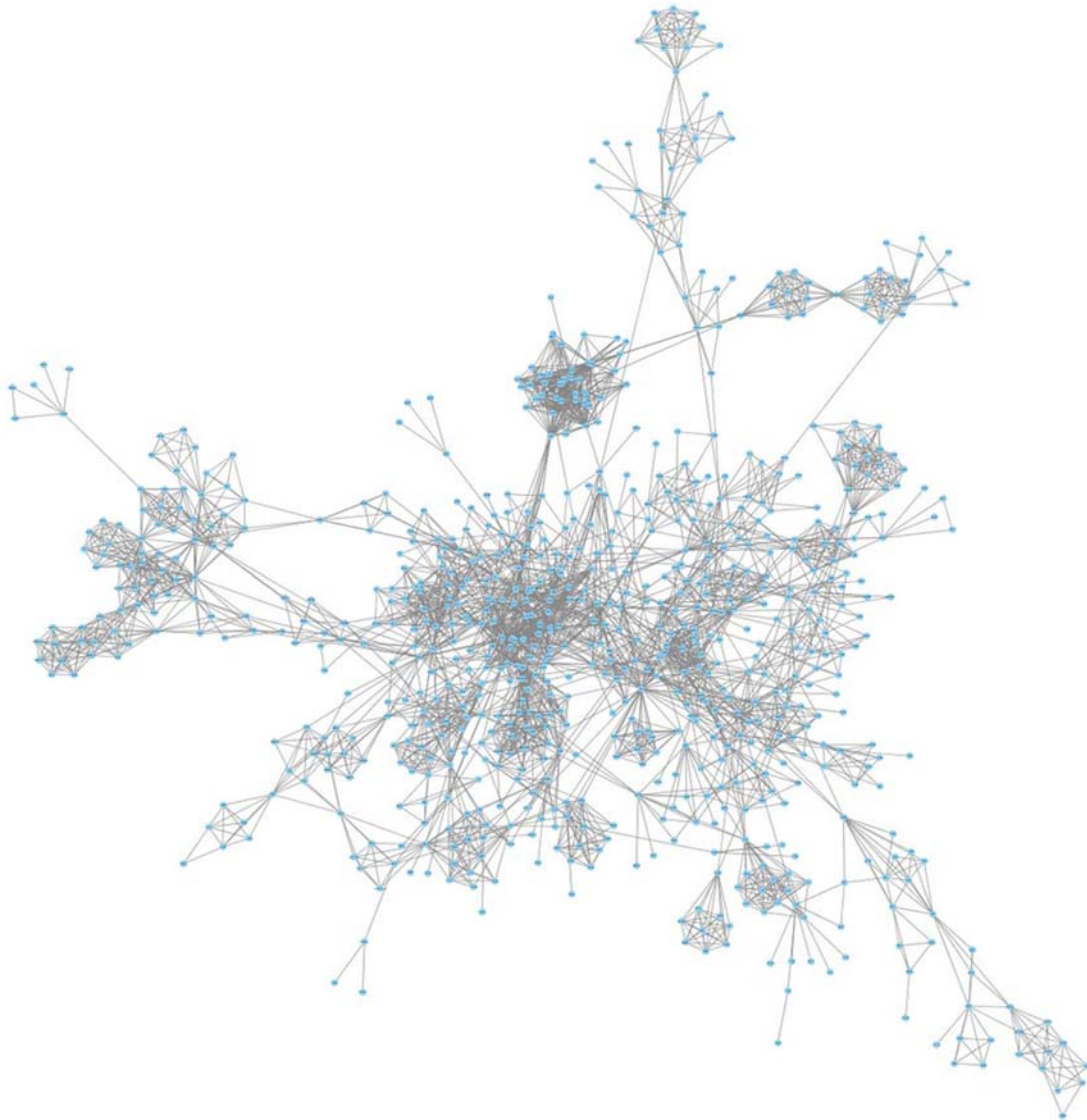

Supplementary Figure 2 Protein-protein interaction networks between OA vs. NC samples

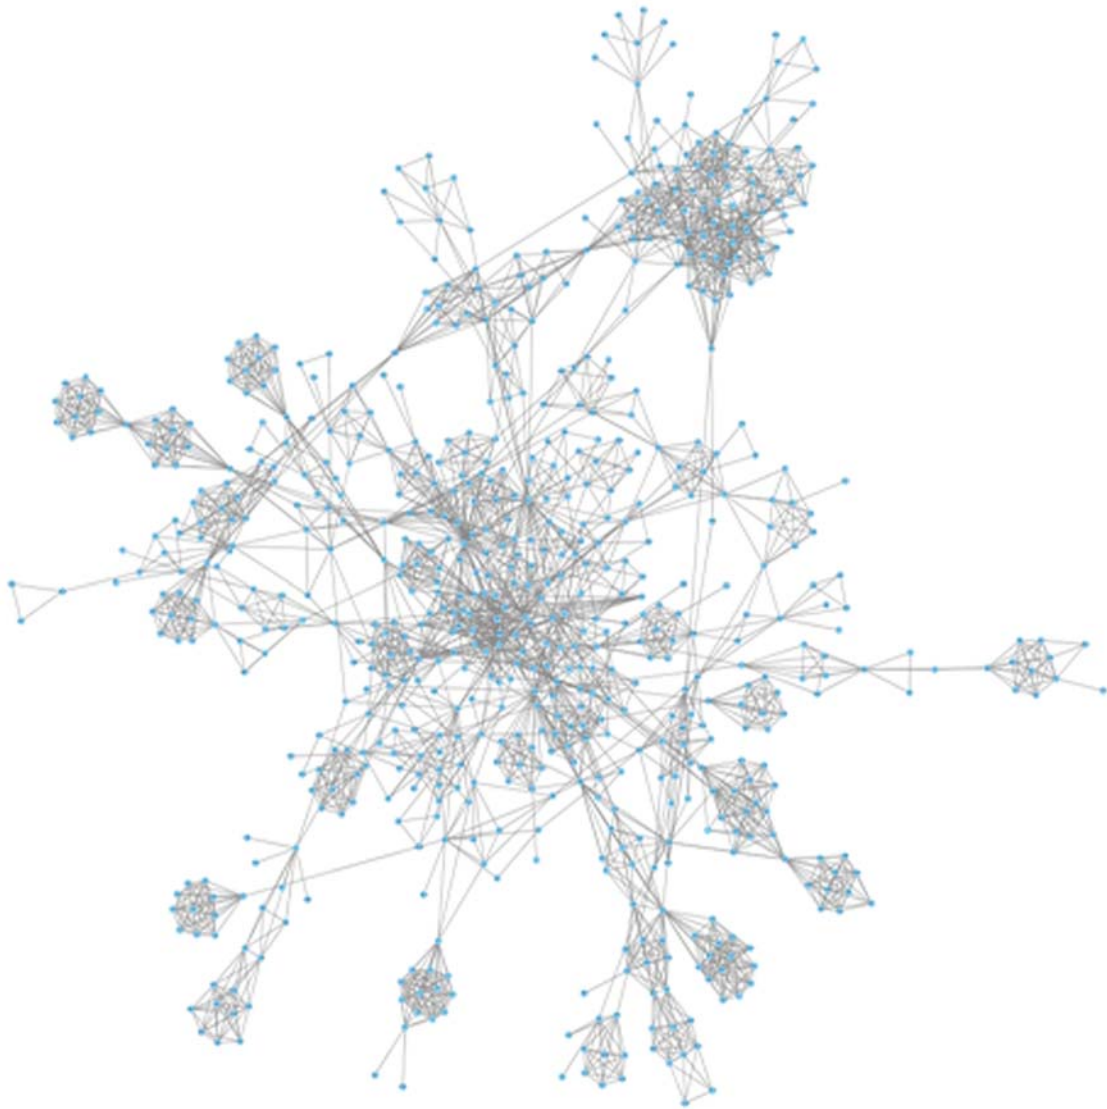

Supplementary Figure 3 Protein-protein interaction networks between RA vs. OA samples

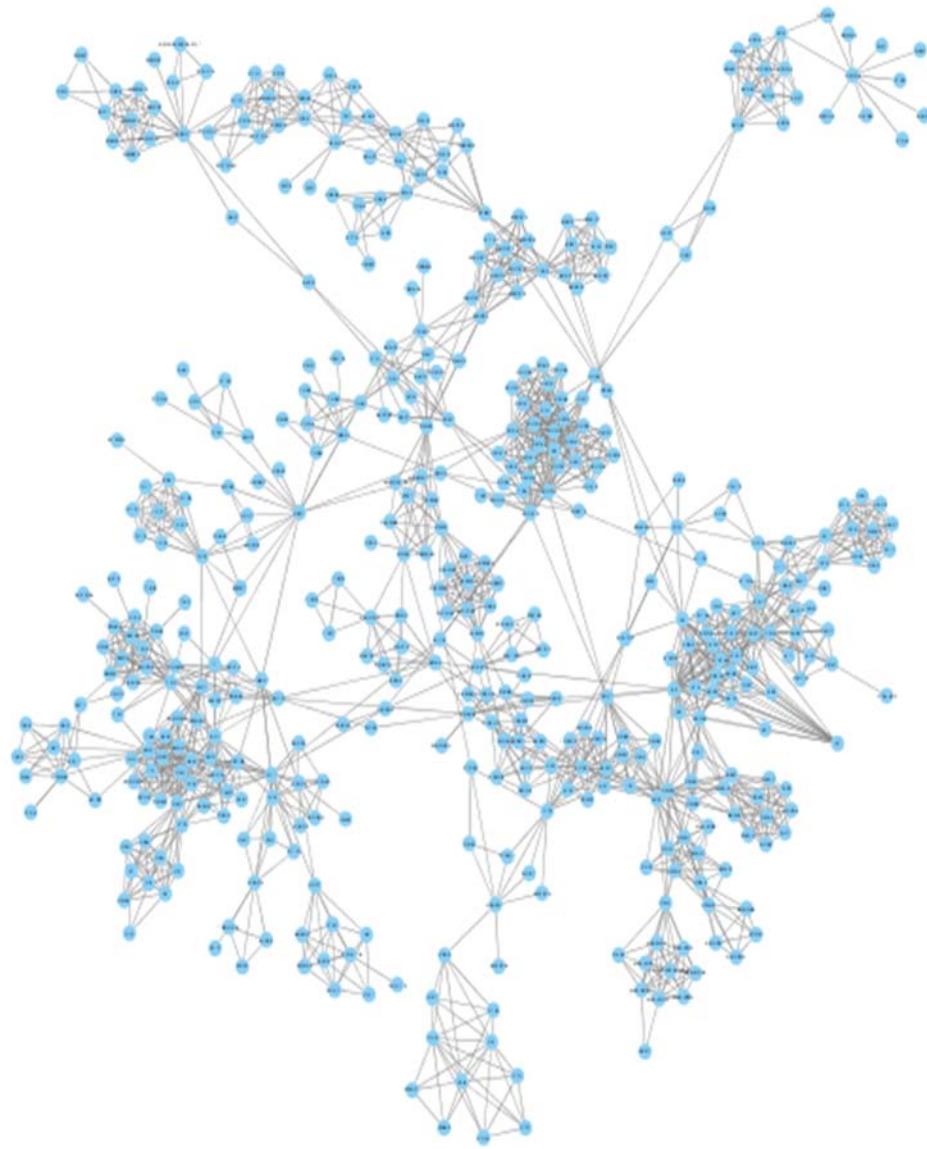

Supplement: medi-97-e10997-s004.pdf [file medi-97-e10997-s004.pdf]
